# Supplementary material for: Insights into the Mechanism of Bipolar Electrodeposition of Au Films and Its Application in Visual Detection of Prostate Specific Antigens
Source: MDPI journal article supplement (doi:10.3390/bios13020158), 2023-01-19
Supplement: s1 [file s1]

# Insights into the Mechanism of Bipolar Electrodeposition of Au Films and Its Application in Visual Detection of Prostate Specific Antigens

Daoyuan Zhao<sup>a</sup>, Yujing Liu<sup>b</sup>, Hong Jiang<sup>b</sup>, Haijian Yang<sup>a</sup>, Huihui Yu<sup>a</sup>, Jingtang Qiao<sup>a</sup>, Zhiwen Li<sup>a</sup>, Bing Jin<sup>a\*</sup>, and Meisheng Wu<sup>a\*</sup>

<sup>a</sup>Department of Chemistry, College of Sciences, Nanjing Agricultural University, 1 Weigang, Nanjing 210095, P.R. China.

<sup>b</sup>College of Life Sciences, Nanjing Agricultural University, 1 Weigang, Nanjing 210095, P.R. China.

Correspondence: [wumeisheng@njau.edu.cn](mailto:wumeisheng@njau.edu.cn) (M. S. Wu.); [jinbing@njau.edu.cn](mailto:jinbing@njau.edu.cn) (B. Jin)

## Contents

- 1. Video S1.** Deposition of Au at the cathode of bare GP (cathode)—Au particles modified GP (anode). 10 mM PBS and H<sub>2</sub>AuCl<sub>4</sub> were filled into the left and right reservoirs, respectively. A constant voltage of 4.5 V was applied on Pt wires for 5 min. 5 × frame rate.
- 2. Video S2.** Deposition of Au at the cathode of bare GP (cathode)—Au particles modified GP (anode). Both reservoirs were filled with H<sub>2</sub>AuCl<sub>4</sub>. A constant voltage of 4.5 V was applied on Pt wires for 5 min. 10 × frame rate.
- 3. Scheme S1** Close bipolar deposition device. (1) Flat PDMS slice, (2) Graphite paper (GP), (3) PDMS slice with two small holes (diameter of 3 mm) on it, and (4) PDMS slice with two large holes (diameter of 7 mm) on it.
- 4. Figure S1** Amperometric i-t plots.
- 5. Figure S2** Effect of water on the dissolution and deposition of Au particles.
- 6. Figure S3** Effect of 10 mM PBS on the dissolution and deposition of Au.
- 7. Figure S4** Effects of HCl and different concentrations of PBS on the dissolution and deposition of Au.
- 8. Figure S5** SEM images of (A) GP, (B) Au-1 film modified GP, and (C) Au-2 film modified GP.
- 9. Figure S6** XRD patterns of GP substrate, Au-1 film modified GP (Au-1/GP), and Au-2 film modified GP (Au-2/GP).

- 10. Figure S7** ECL signal obtained on the prepared BPE modified with Au particles at both poles.
- 11. Figure S8** Reproducibility and stability of the prepared Au modified BPE in ECL measurement.
- 12. Figure S9** Optical images of Au modified BPE after three consecutive detections.
- 13. Figure S10** TEM image of SiO<sub>2</sub> NPs and EIS of different biomolecules modified Au electrodes.
- 14. Figure S11** Selectivity of the designed biosensor towards thrombin and BSA.
- 15. Table S1** Electrical conductivity of solutions.
- 16. Table S2** Performance of the proposed biosensor compared with other biosensors

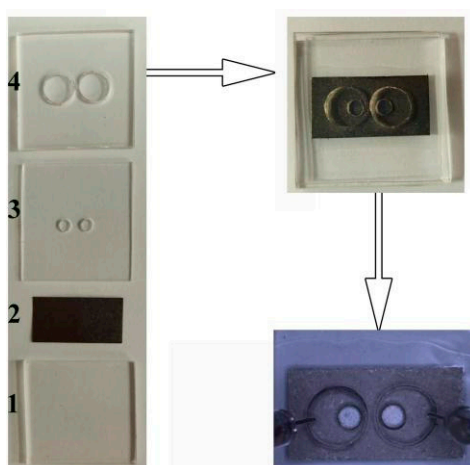

**Scheme S1** Closed bipolar deposition device.

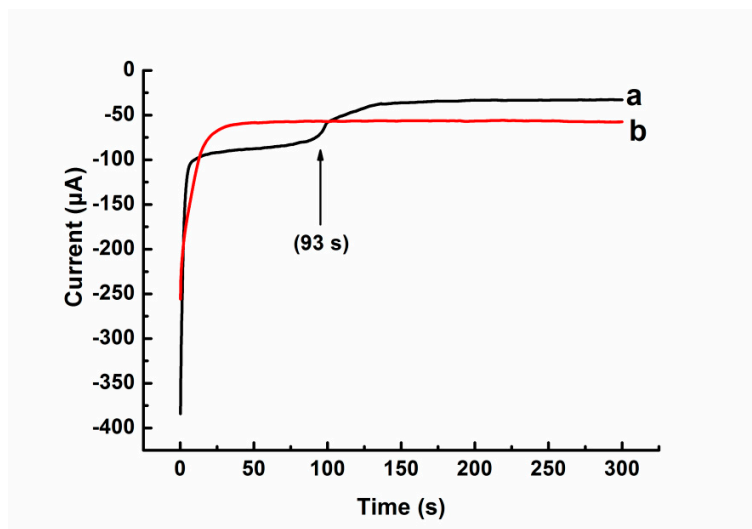

**Figure S1** Amperometric i-t plots obtained on bare GP (cathode)-Au modified GP (anode) BPE when the anode was immersed into 10 mM PBS (a) and 5 mM HAuCl<sub>4</sub> (b), respectively. The cathode was immersed into 5 mM HAuCl<sub>4</sub>. The external voltage was 4.5 V.

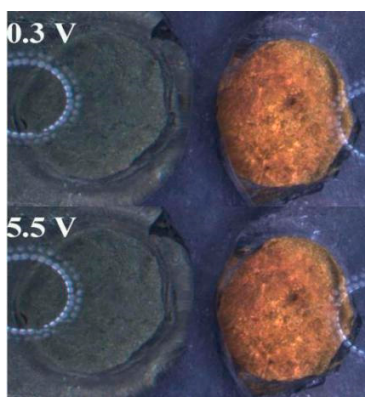

**Figure S2** Optical images recorded during the second deposition of Au under linear sweep voltage. The left reservoir was filled with 5 mM HAuCl<sub>4</sub> and the right reservoir was filled with water. The voltage was applied from 0 to 5.5 V at a scan rate of 0.005 V/s.

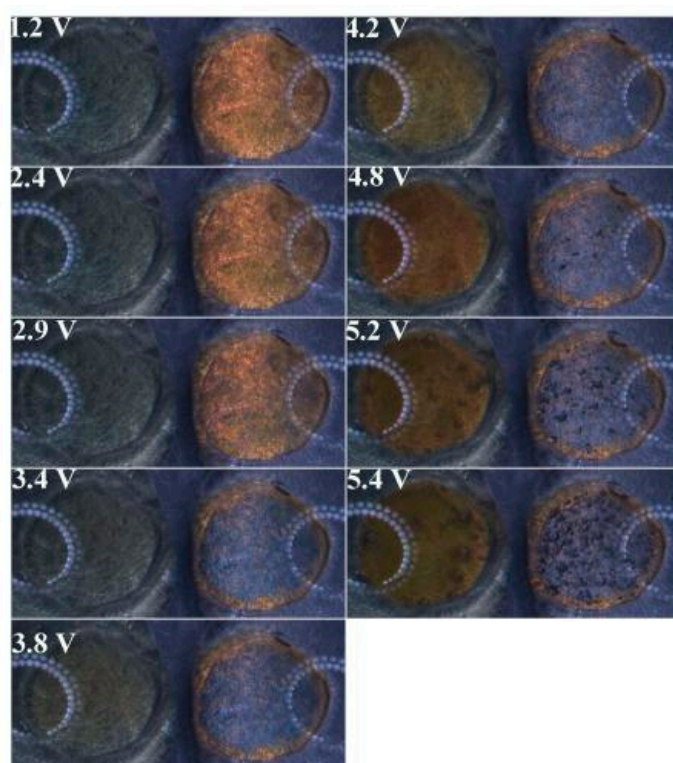

**Figure S3** Optical images recorded during the second deposition of Au under linear sweep voltage. The left reservoir was filled with 5 mM HAuCl<sub>4</sub> and the right reservoir was filled with 10 mM PBS. The applied voltage was from 0 to 5.5 V at a scan rate of 0.005 V/s.

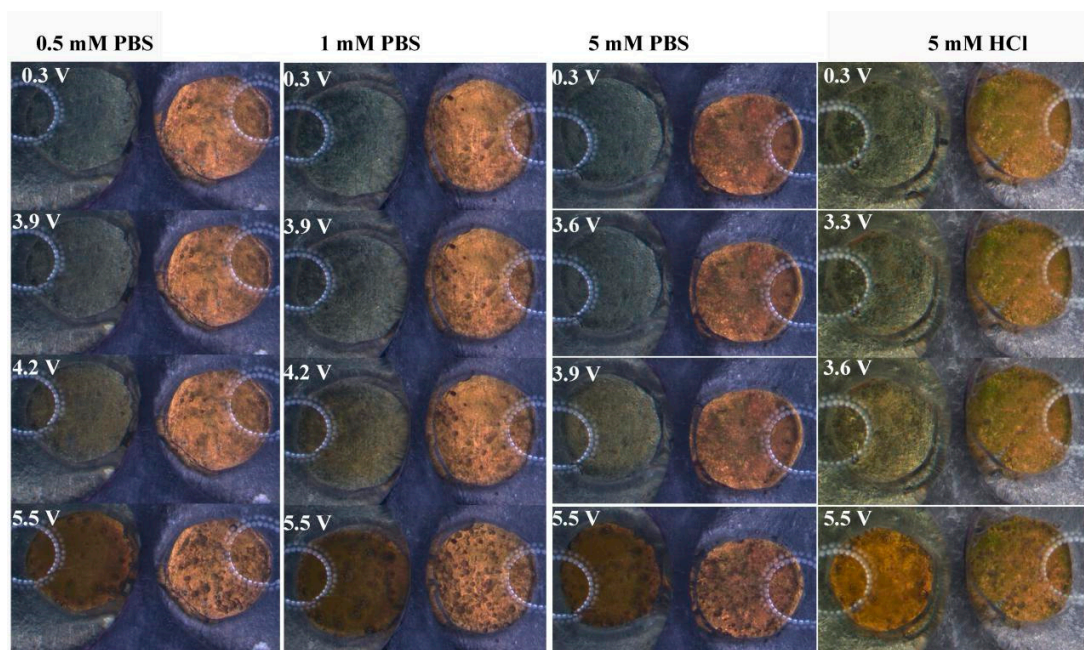

**Figure S4** Optical images recorded during the second deposition of Au under linear sweep voltage. The left reservoir was filled with 5 mM HAuCl<sub>4</sub> and the right reservoir was filled with 0.5 mM PBS, 1 mM PBS, 5 mM PBS, and 5 mM HCl. The applied voltage was from 0 to 5.5 V at a scan rate of 0.005 V/s.

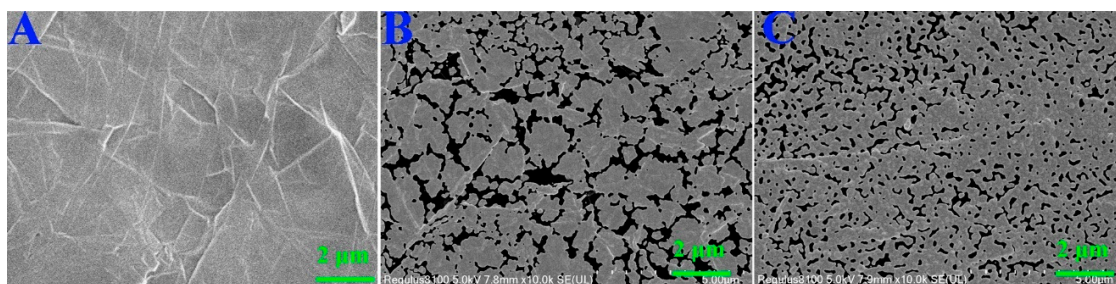

**Figure S5** SEM images of (A) GP, (B) Au-1 film modified GP, and (C) Au-2 film modified GP.

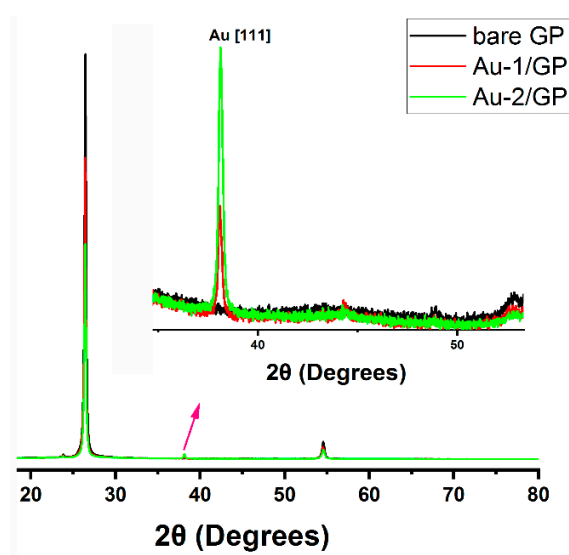

**Figure S6** XRD patterns of GP substrate, Au-1 film modified GP (Au-1/GP), and Au-2 film modified GP (Au-2/GP).

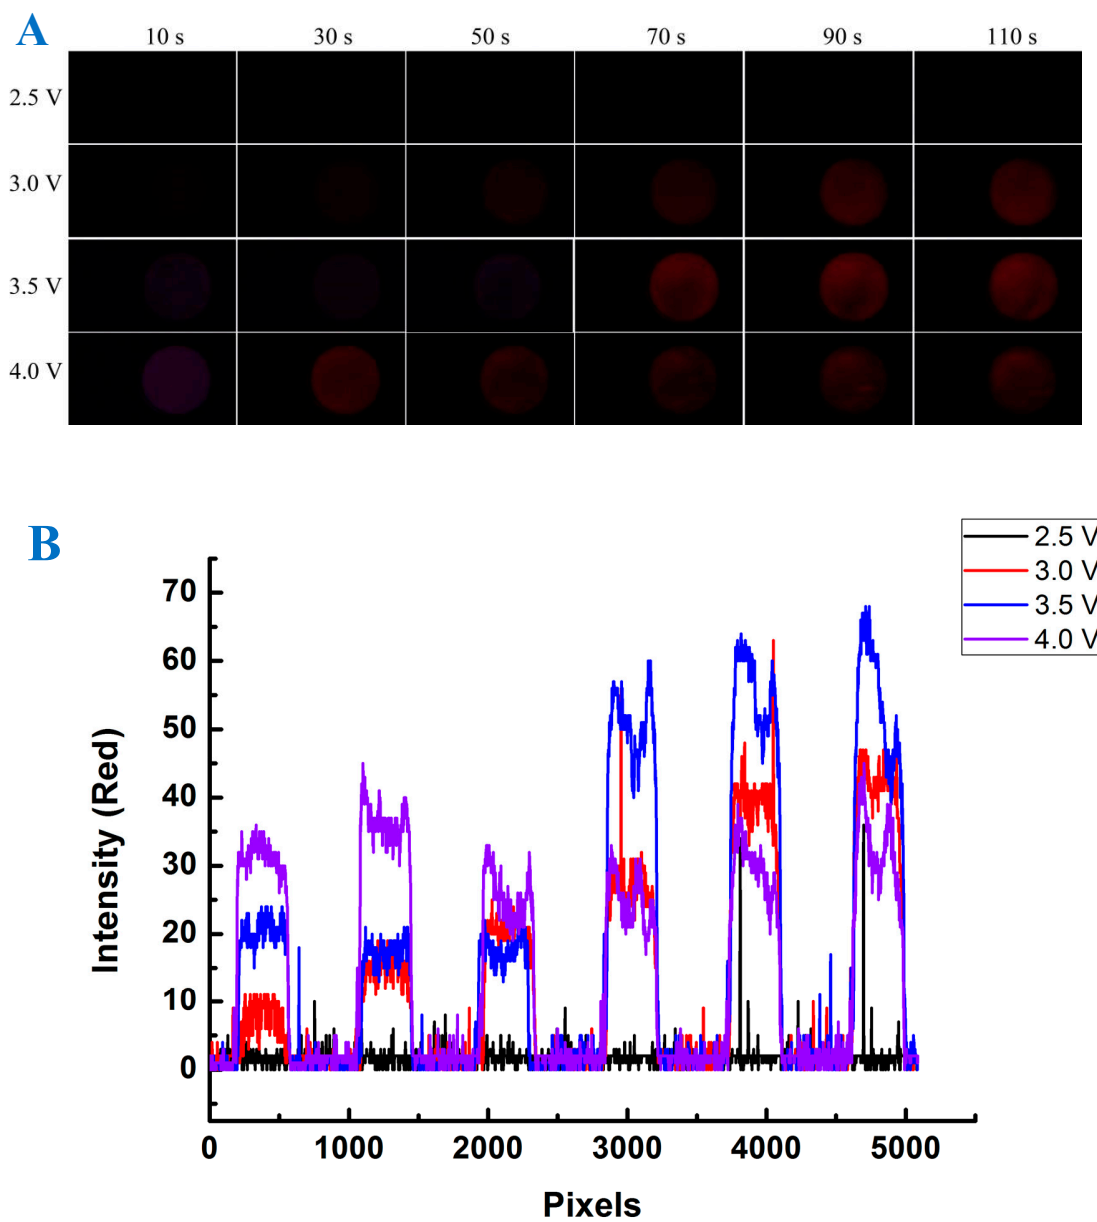

**Figure S7** ECL images (A) and corresponding red channel intensity (B) obtained on Au modified (cathode)-Au modified (anode) GP BPE under different external voltages.



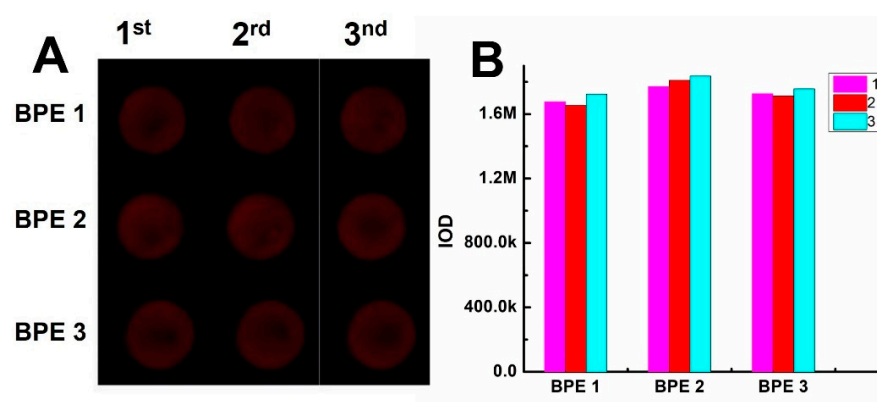

**Figure S8** ECL images (A) and corresponding IOD (integrated optical intensity, B) obtained on four Au modified (cathode)-Au modified (anode) GP BPEs for three consecutive measurements.

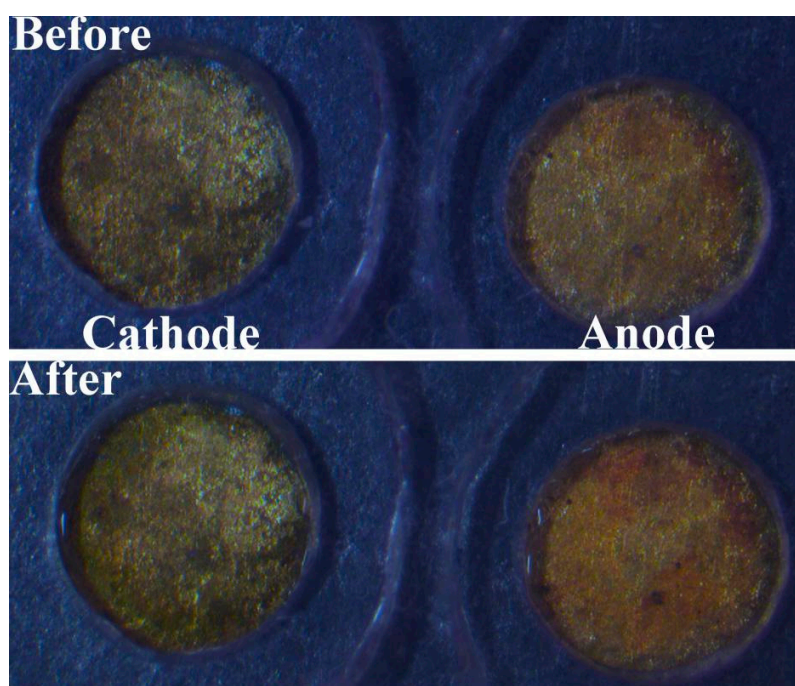

**Figure S9** Images of BPE before and after three consecutive ECL detections.

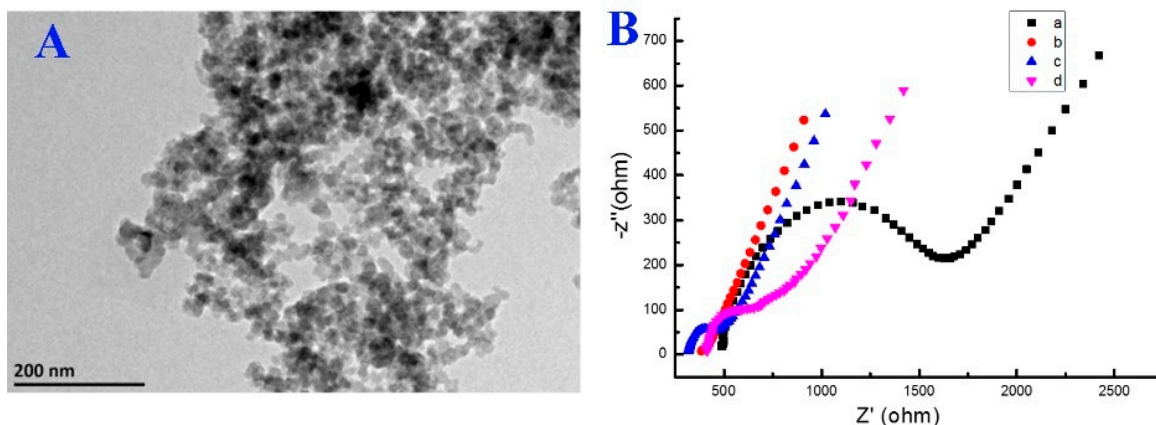

**Figure S10** (A) TEM image of SiO<sub>2</sub> NPs. (B) Electrochemical impedance spectrum of various electrodes. Electrode was immersed in 5.0 mM [Fe(CN)<sub>6</sub>]<sup>3-/4-</sup> solution containing 0.1 M KCl. Frequency range: 0.1-10<sup>5</sup> Hz. (a) Bare GP, (b) Ab<sub>1</sub>/Au/GP, (c) PSA/Ab<sub>1</sub>/Au/GP, (d) Ab<sub>2</sub>-SiO<sub>2</sub>/PSA/Ab<sub>1</sub>/Au/GP.

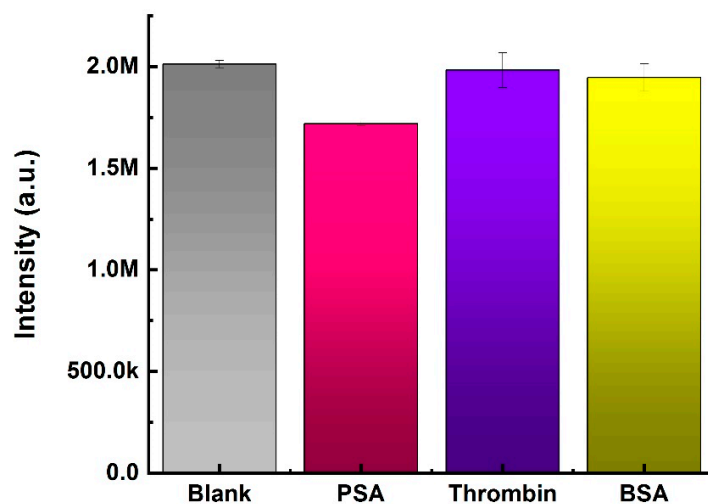

**Figure S11** Selectivity of the designed biosensor towards thrombin and BSA. The concentration of PSA was 1 ng/mL. The concentration of thrombin and BSA were 10 ng/mL.

**Table S1** Conductivity of solutions

| Solution              | Conductivity ( $\mu\text{S/cm}$ ) |
|-----------------------|-----------------------------------|
| 10 mM PBS             | Out of range                      |
| 5 mM PBS              | 8280                              |
| 5 mM $\text{HAuCl}_4$ | 2340                              |
| 5 mM HCl              | 2000                              |
| 1 mM PBS              | 1779                              |
| 0.5 mM PBS            | 923                               |
| $\text{H}_2\text{O}$  | 1.70                              |

**Table S2** Performance of the proposed biosensor compared with other biosensors

| Analytical method          | Linear range (ng/mL) | LOD (ng/mL) | Refs     |
|----------------------------|----------------------|-------------|----------|
| ECL                        | 1.0 to 1000          | 0.5         | [1]      |
| ECL                        | 0.5 to 50            | 0.031       | [2]      |
| Colorimetric assay         | 0.1 to 100           | 0.02        | [3]      |
| Electrochromic assay       | 0.1 to 50            | 0.03        | [4]      |
| Photothermal imaging assay | 1 to 200             | 0.2         | [5]      |
| ECL                        | 0.1 to 1000          | 0.071       | Our work |

## References:

- [1] Lu, H.-J., Zhao, W., Xu, J.-J., and Chen, H.-Y. Visual electrochemiluminescence ratiometry on bipolar electrode for bioanalysis, *Biosensors and Bioelectronics* **2018**, 102, 624-630.
- [2] Cao, J.-T., Wang, Y.-L., Zhang, J.-J., Dong, Y.-X., Liu, F.-R., Ren, S.-W., and Liu, Y.-M. Immuno-Electrochemiluminescent Imaging of a Single Cell Based on Functional Nanoprobes of Heterogeneous  $\text{Ru}(\text{bpy})_3^{2+}/\text{SiO}_2/\text{Au}$  Nanoparticles, *Analytical chemistry* **2018**, 90, 10334-10339.
- [3] Shayesteh, O. H., and Ghavami, R. A novel label-free colorimetric aptasensor for sensitive determination of PSA biomarker using gold nanoparticles and a cationic polymer in human serum, *Spectrochimica Acta Part A: Molecular and Biomolecular Spectroscopy* **2020**, 226, 117644.
- [4] Lei, Q., Wang, Y., Dong, W., Sun, H., Lv, J., and Li, H. Self-powered electrochromic sensing for visual determination of PSA in serum using PB as an indicator, *Journal of Electroanalytical Chemistry* **2019**, 839, 108-115.

- [5] Lv, S., Zhang, K., and Tang, D. A new visual immunoassay for prostate-specific antigen using near-infrared excited CuxS nanocrystals and imaging on a smartphone, *The Analyst* **2019**, *144*, 3716-3720.
